# Supplementary material for: Placing the Common Era in a Holocene context: millennial to centennial patterns and trends in the hydroclimate of North America over the past 2000 years
Source: Copernicus journal article supplement (doi:10.5194/cp-14-665-2018), 2018-05-28
Supplement: Supplementary file 1 [file cp-14-665-2018-supplement.zip]

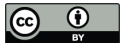

## *Supplement of*

# **Placing the Common Era in a Holocene context: millennial to centennial patterns and trends in the hydroclimate of North America over the past 2000 years**

**Bryan N. Shuman et al.**

*Correspondence to:* Bryan N. Shuman (bshuman@uwyo.edu)

- cp-14-665-2018-supplement-title-page.pdf
- Shuman\_cp-2017-35\_Table\_1\_Final.xlsx

The copyright of individual parts of the supplement might differ from the CC BY 3.0 License.
